# Supplementary material for: A checklist to assess Trustworthiness in RAndomised Controlled Trials (TRACT checklist)
Source: Research Square preprint supplement (doi:10.21203/rs.3.rs-2119486/v1), 2023-01-11
Supplement: Supplementary file 1 [file 00f2ff87e9e291d04741c178.docx]

**Table 1: The TRACT Screening Checklist**

Overview

This screening tool aims to help identify and triage studies at risk of integrity issues. The checklist includes eight domains that are applicable to every RCT; governance, author group, plausibility of intervention usage, timeframe, drop-out rates, baseline characteristics and outcomes.

Users

This tool is designed to be used by clinical experts on articles in their field of study as a degree of clinical judgement and experience will be required for some items, and especially those using subjective or descriptive terms. It may also be beneficial to seek assistance from a statistician for some items.

Instructions for Use

The screening tool requires information found in the full text of the trial report and trial registration (if applicable) – please ensure you collect these prior to using the tool. Each item in the checklist is rated using a colour-coded system: green represents low risk, yellow represents an unclear or non-applicable risk, and red represents high risk. For each item there is also room to address the reasonings for the chosen rating. There is also a free-text space for users to add additional comments about other integrity issues if required. Some items will have footnotes to help assist use and rating.

Details

| Article Title, Year |  |
| --- | --- |
| Author(s) |  |

Checklist

| *DOMAIN* | *ITEM* | *RATING* | | | | | *SUPPORT FOR JUDGEMENT* |
| --- | --- | --- | --- | --- | --- | --- | --- |
| No Concerns | Some Concerns/  No Information | | | Major Concerns |
| Governance | Absent or retrospective registration of RCTs. This is relevant for RCTs commencing after 2010 |  | |  | |  |  |
| Discrepancy of >15% between the intended sample size in the trial registration compared to the actual sample size achieved in the RCT[[1]](#footnote-1) |  | |  | |  |  |
| Absent or vague description of research ethics or apparent concerns regarding ethics[[2]](#footnote-2) |  | |  | |  |  |
| Author Group[[3]](#footnote-3) | Number of authors 3 or low author to study size ratio |  | |  | |  |  |
| Other studies of authors have been retracted not on request of the authors[[4]](#footnote-4) |  | |  | |  |  |
| Large number of RCTs published in a short time frame by one author/in one institute[[5]](#footnote-5) |  | | |  |  |  |
| Plausibility of Intervention Usage | Insufficient or implausible description of allocation concealment (e.g. two interventions but only one placebo)[[6]](#footnote-6) |  | | |  |  |  |
| Unnecessary or illogical description of methodological standards (e.g. use of sealed envelopes in a placebo-controlled trial) |  | | |  |  |  |
| Timeframe | Fast recruitment of participants within the study time (especially single centre studies) |  | | |  |  |  |
| Short or impossible time frame between ending recruitment/follow up and submission of the paper (take into account time to outcome e.g. live birth, pregnancy outcome etc.)[[7]](#footnote-7) |  | | |  |  |  |
| Drop-Out Rates | Zero participants lost to follow up or no reasons mentioned for loss of follow up[[8]](#footnote-8) |  | | |  |  |  |
| Ideal number of losses to follow up resulting in perfectly rounded number in each group (e.g. groups of 50 or 100) |  | | |  |  |  |
| Baseline Characteristics | No or few baseline (<5) characteristics presented |  | | |  |  |  |
| Implausible patient characteristics judging from common sense, the literature and local data (e.g. similar standard deviations for completely different characteristics with different means and distributions) |  | | |  |  |  |
| Perfect balance for multiple baseline characteristics or significant/large differences between baseline characteristics |  | | |  |  |  |
| Important prognostic factors are not reported as baseline characteristics |  | | |  |  |  |
| Outcomes | Effect size that is much larger than in other RCTs regarding the same topic[[9]](#footnote-9) |  | | |  |  |  |
| Conflicting information between outcomes (e.g. more ongoing pregnancies than clinical pregnancies) |  | | |  |  |  |
| Change in primary outcome from registration to publication |  | | |  |  |  |

Additional Comments

____________________________________________________________________________________________________________________________________________________________________________________________________________________________________________________________________________________________________________________________________________________________________________________________________________________________________________________________________________________________________________________

1. If registration is retrospective, then by definition the RCT sample size will the same as the registered number [↑](#footnote-ref-1)
2. Obtaining proof of ethics approval (or similar) may be useful to guide the rating of this item [↑](#footnote-ref-2)
3. Consider using publisher services such as Scopus or Clarivate to identify authors and their publications [↑](#footnote-ref-3)
4. Consider checking <http://retractiondatabase.org/RetractionSearch.aspx> [↑](#footnote-ref-4)
5. This ‘number’ is subjective based on the field of study, author or author group, number of recruitment centres, and timeframe [↑](#footnote-ref-5)
6. Consider if the interventions and control/placebo are explained sufficiently enough to be repeated in another experiment [↑](#footnote-ref-6)
7. The recruitment time frame is from the date of the first recruited patient to the date of the last recruited patient [↑](#footnote-ref-7)
8. Especially in cases of long follow up (e.g. multiple months) and/or multiple cycles of or long-lasting interventions [↑](#footnote-ref-8)
9. Consider utilising meta-analyses if available [↑](#footnote-ref-9)
